# Supplementary material for: Potential role of a novel biphenanthrene derivative isolated from Aerides falcata in central nervous system diseases
Source: Royal Society of Chemistry journal article supplement (doi:10.1039/d3ra01402a), 2023-01-01
Supplement: d3ra01402a1.pdf [file d3ra01402a1.pdf]

SUPPLEMENTARY MATERIAL

**Potential Role of a Novel Biphenanthrene Derivative Isolated from *Aerides falcata* in Central Nervous System Diseases**

Bachtiar Rivai<sup>a</sup>, Hasriadi<sup>b</sup>, Peththa Wadu Dasuni Wasana<sup>c</sup>, Chaisak Chansriniyom<sup>d,e</sup>, Pasarapa Towiwat<sup>b,f</sup>, Yanyong Punpreuk<sup>g</sup>, Kittisak Likhitwitayawuid<sup>d</sup>, Pornchai Rojsitthisak<sup>f,h</sup>, Boonchoo Sritularak<sup>d,f\*</sup>

<sup>a</sup> Pharmaceutical Sciences and Technology Program, Faculty of Pharmaceutical Sciences, Chulalongkorn University, Bangkok 10330, Thailand

<sup>b</sup> Department of Pharmacology and Physiology, Faculty of Pharmaceutical Sciences, Chulalongkorn University, Bangkok 10330, Thailand

<sup>c</sup> Department of Pharmacy, Faculty of Allied Health Sciences, University of Ruhuna, Galle 80000, Sri Lanka

<sup>d</sup> Department of Pharmacognosy and Pharmaceutical Botany, Faculty of Pharmaceutical Sciences, Chulalongkorn University, Bangkok 10330, Thailand

<sup>e</sup> Natural products and Nanoparticles Research Unit, Chulalongkorn University, Bangkok, 10330, Thailand

<sup>f</sup> Center of Excellence in Natural Products for Ageing and Chronic Diseases, Chulalongkorn University, Bangkok, 10330, Thailand.

<sup>g</sup> Department of Agriculture, Ministry of Agriculture and Cooperatives, Bangkok, 10900, Thailand

<sup>h</sup> Department of Food and Pharmaceutical Chemistry, Faculty of Pharmaceutical Sciences, Chulalongkorn University, Bangkok 10330, Thailand

CONTACT: Boonchoo Sritularak; boonchoo.sr@chula.ac.th

KEYWORDS: *Aerides falcata*, Orchidaceae, biphenanthrene, CNS diseases,

| Contents                                                                                                       | page |
|----------------------------------------------------------------------------------------------------------------|------|
| Figure S1. <sup>1</sup> H NMR spectrum of <b>1</b> (400 MHz) in acetone- <i>d</i> <sub>6</sub>                 | 4    |
| Figure S2. <sup>13</sup> C NMR spectrum of <b>1</b> (100 MHz) in acetone- <i>d</i> <sub>6</sub>                | 4    |
| Figure S3. <sup>1</sup> H NMR spectrum of <b>1</b> (400 MHz) in acetone- <i>d</i> <sub>6</sub> (dried sample)  | 5    |
| Figure S4. <sup>13</sup> C NMR spectrum of <b>1</b> (100 MHz) in acetone- <i>d</i> <sub>6</sub> (dried sample) | 5    |
| Figure S5. HSQC (1) correlation of <b>1</b> in acetone- <i>d</i> <sub>6</sub>                                  | 6    |
| Figure S6. HSQC (2) correlation of <b>1</b> in acetone- <i>d</i> <sub>6</sub>                                  | 6    |
| Figure S7. HSQC (3) correlation of <b>1</b> in acetone- <i>d</i> <sub>6</sub>                                  | 7    |
| Figure S8. HMBC (1) correlation of <b>1</b> in acetone- <i>d</i> <sub>6</sub>                                  | 7    |
| Figure S9. HMBC (2) correlation of <b>1</b> in acetone- <i>d</i> <sub>6</sub>                                  | 8    |
| Figure S10. HMBC (3) correlation of <b>1</b> in acetone- <i>d</i> <sub>6</sub>                                 | 8    |
| Figure S11. HMBC (4) correlation of <b>1</b> in acetone- <i>d</i> <sub>6</sub>                                 | 9    |
| Figure S12. COSY correlation of <b>1</b> in acetone- <i>d</i> <sub>6</sub>                                     | 9    |
| Figure S13. NOESY correlation of <b>1</b> in acetone- <i>d</i> <sub>6</sub>                                    | 10   |
| Figure S14. HRESIMS spectrum of <b>1</b>                                                                       | 10   |
| Table S1. NMR spectral data of <b>2</b> and n-eicosyl-trans ferulate                                           | 11   |
| Figure S15. HRESIMS spectrum of <b>2</b>                                                                       | 11   |
| Table S2. NMR spectral data of <b>3</b> and denthysinin                                                        | 12   |
| Figure S16. HRESIMS spectrum of <b>3</b>                                                                       | 12   |
| Table S3. NMR spectral data of <b>4</b> and 2,4-dimethoxy-3,7 - dihydroxyphenanthrene                          | 13   |
| Figure S17. HRESIMS spectrum of <b>4</b>                                                                       | 13   |
| Table S4. NMR spectral data of <b>5</b> and 2,7-dihydroxy-3,4,6-trimethoxyphenanthrene                         | 14   |
| Figure S18. HRESIMS spectrum of <b>5</b>                                                                       | 14   |
| Table S5. NMR spectral data of <b>6</b> and 3,7-dihydroxy-2,4,6-trimethoxyphenanthrene                         | 15   |
| Figure S19. HRESIMS spectrum of <b>6</b>                                                                       | 15   |
| Table S6. NMR spectral data of <b>7</b> and agrostinin                                                         | 16   |
| Figure S20. HRESIMS spectrum of <b>7</b>                                                                       | 16   |
| Table S7. NMR spectral data of <b>8</b> and trans-n-coumaroyltyramine                                          | 17   |

|                                                                                                        |    |
|--------------------------------------------------------------------------------------------------------|----|
| Figure S21. HRESIMS spectrum of <b>8</b>                                                               | 17 |
| Table S8. NMR spectral data of <b>9</b> and syringaresinol                                             | 18 |
| Figure S22. HRESIMS spectrum of <b>9</b>                                                               | 18 |
| Table S9. NMR spectral data of <b>10</b> and trans-n-feruloytyramine                                   | 19 |
| Figure S23. HRESIMS spectrum of <b>10</b>                                                              | 19 |
| Table S10. Effects of constituents of <i>Aerides falcata</i> on the viability of BV-2 microglial cells | 20 |
| Table S11. Effects of compounds (1), (7), and (9) on the viability of C6 glioblastoma cells            | 20 |

AF36 <sup>1</sup>H-NMR (400 MHz) in acetone-d<sub>6</sub>

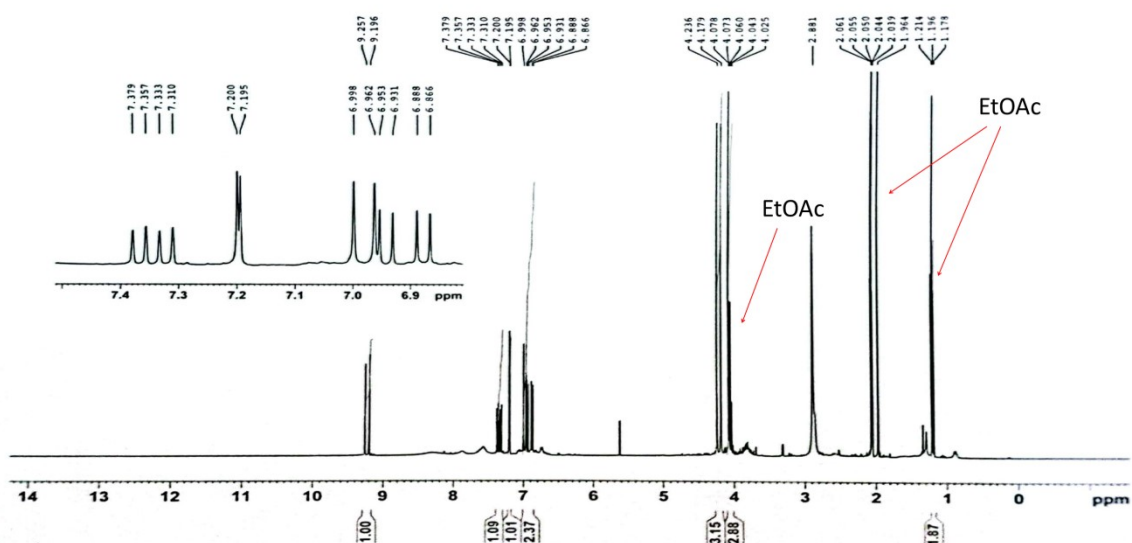

Figure S1. <sup>1</sup>H NMR spectrum of **1** (400 MHz) in acetone-d<sub>6</sub>

AF36 <sup>13</sup>C-NMR (100 MHz) in acetone-d<sub>6</sub>

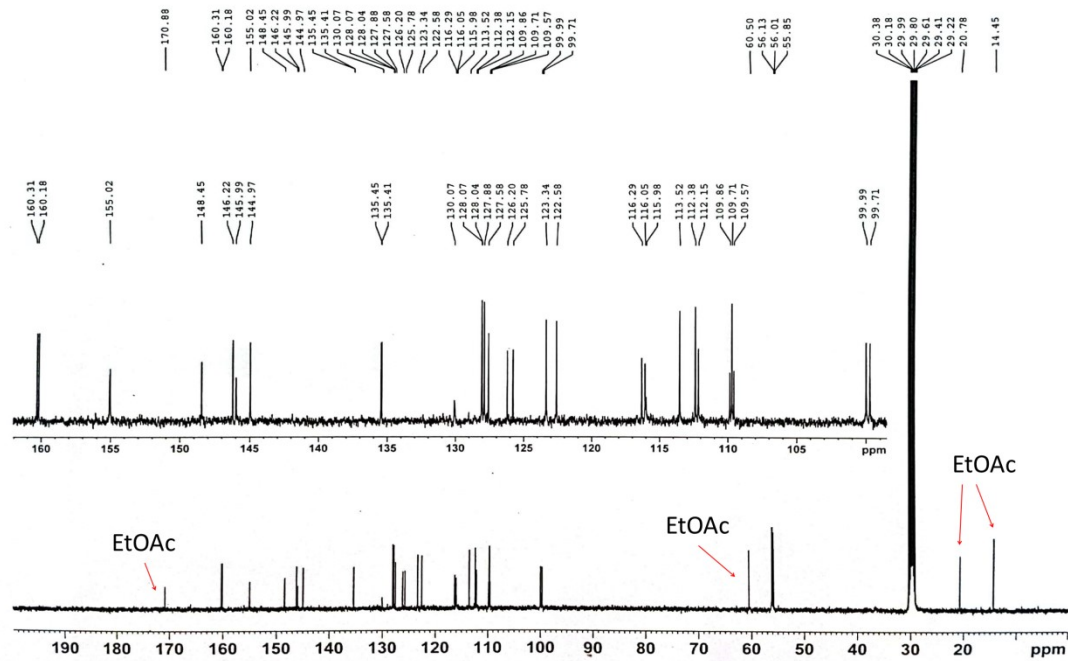

Figure S2. <sup>13</sup>C NMR spectrum of **1** (100 MHz) in acetone-d<sub>6</sub>

Aerifalcatin <sup>1</sup>H NMR 400 MHz in acetone-d<sub>6</sub>

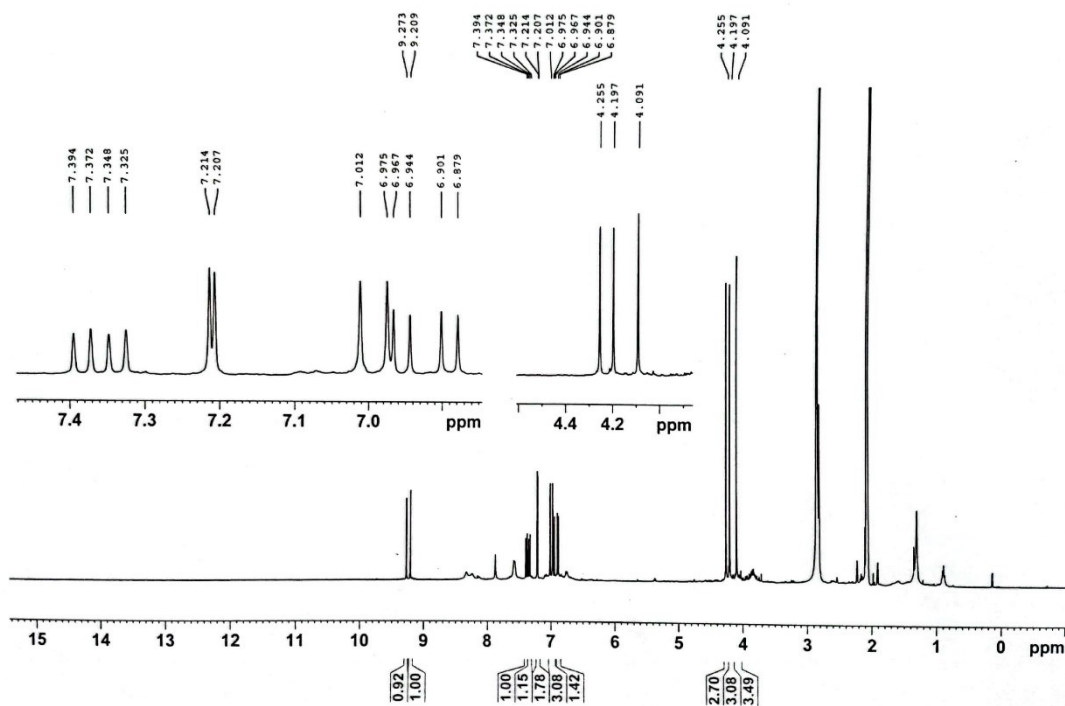

Figure S3. <sup>1</sup>H NMR spectrum of **1** (400 MHz) in acetone-d<sub>6</sub> (dried sample)

Aerifalcatin <sup>13</sup>C NMR 100 MHz in acetone-d<sub>6</sub>

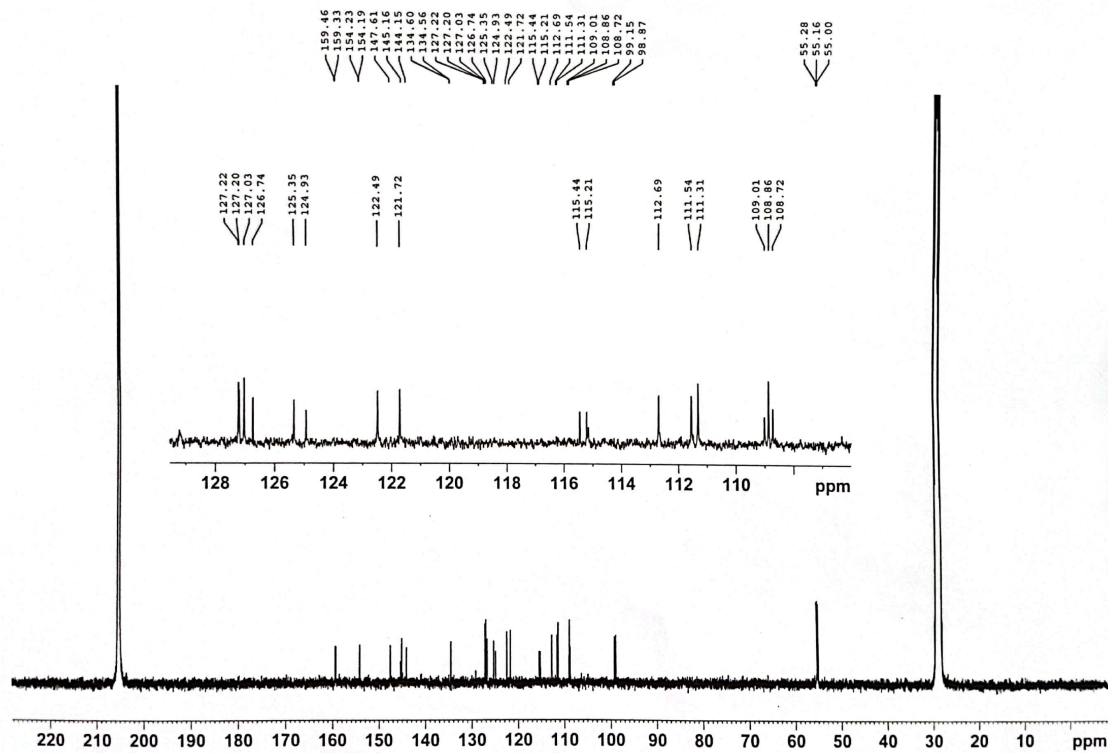

Figure S4. <sup>13</sup>C NMR spectrum of **1** (100 MHz) in acetone-d<sub>6</sub> (dried sample)

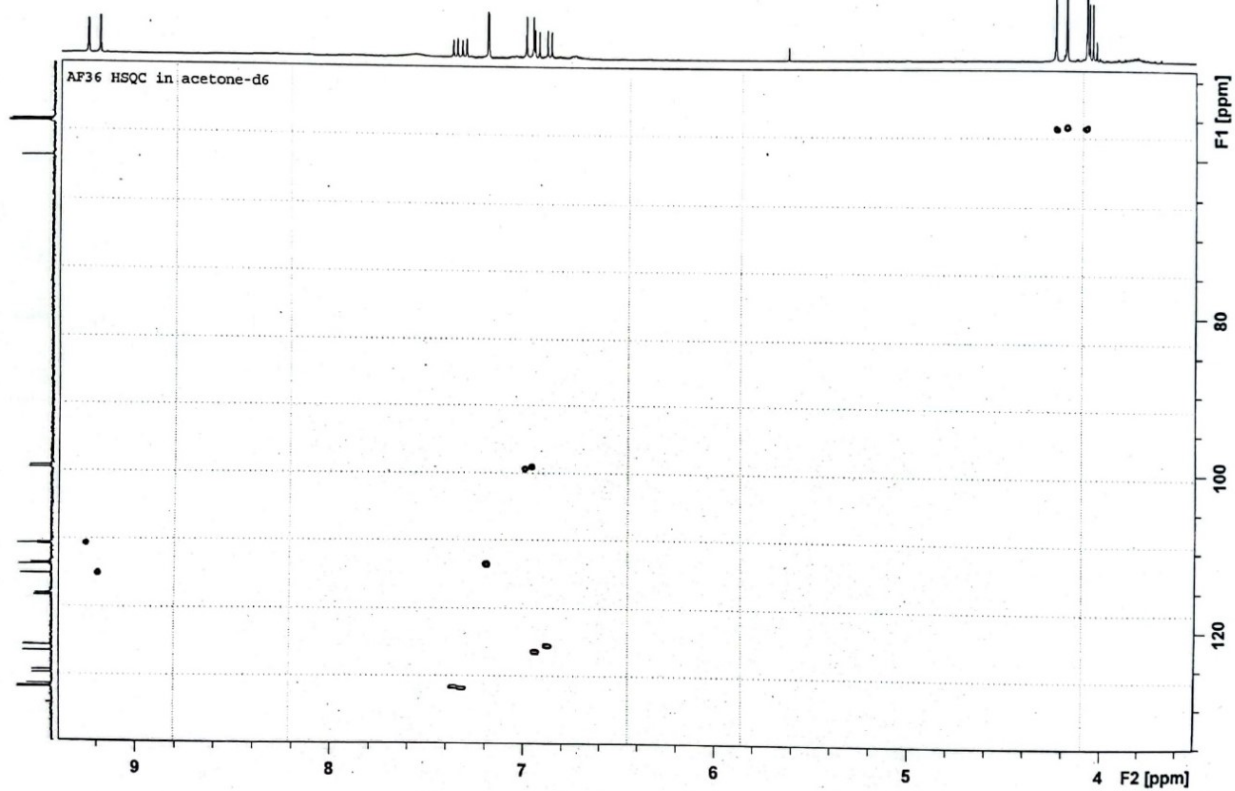

Figure S5. HSQC (1) correlation of **1** in acetone- $d_6$

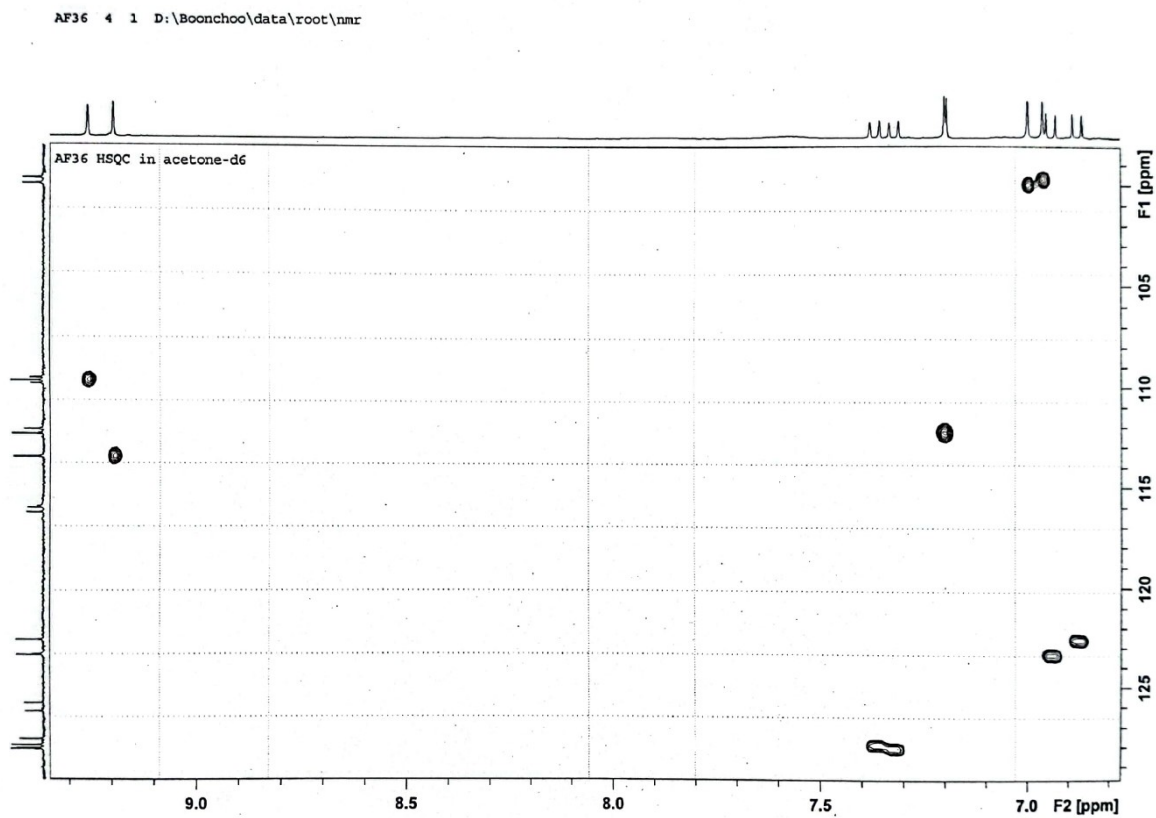

Figure S6. HSQC (2) correlation of **1** in acetone- $d_6$

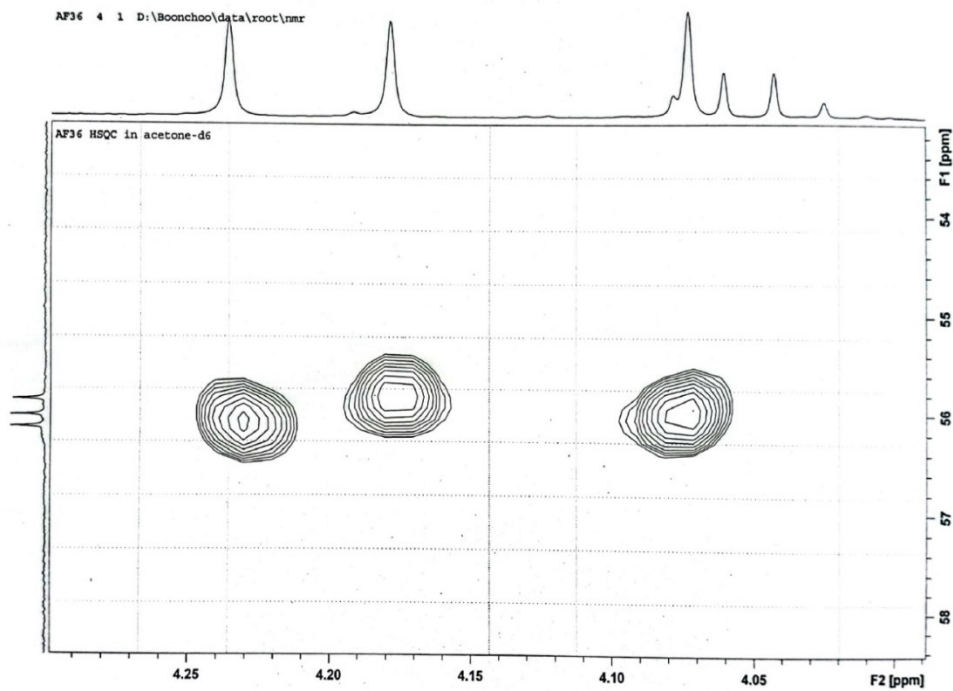

Figure S7. HSQC (3) correlation of **1** in acetone- $d_6$

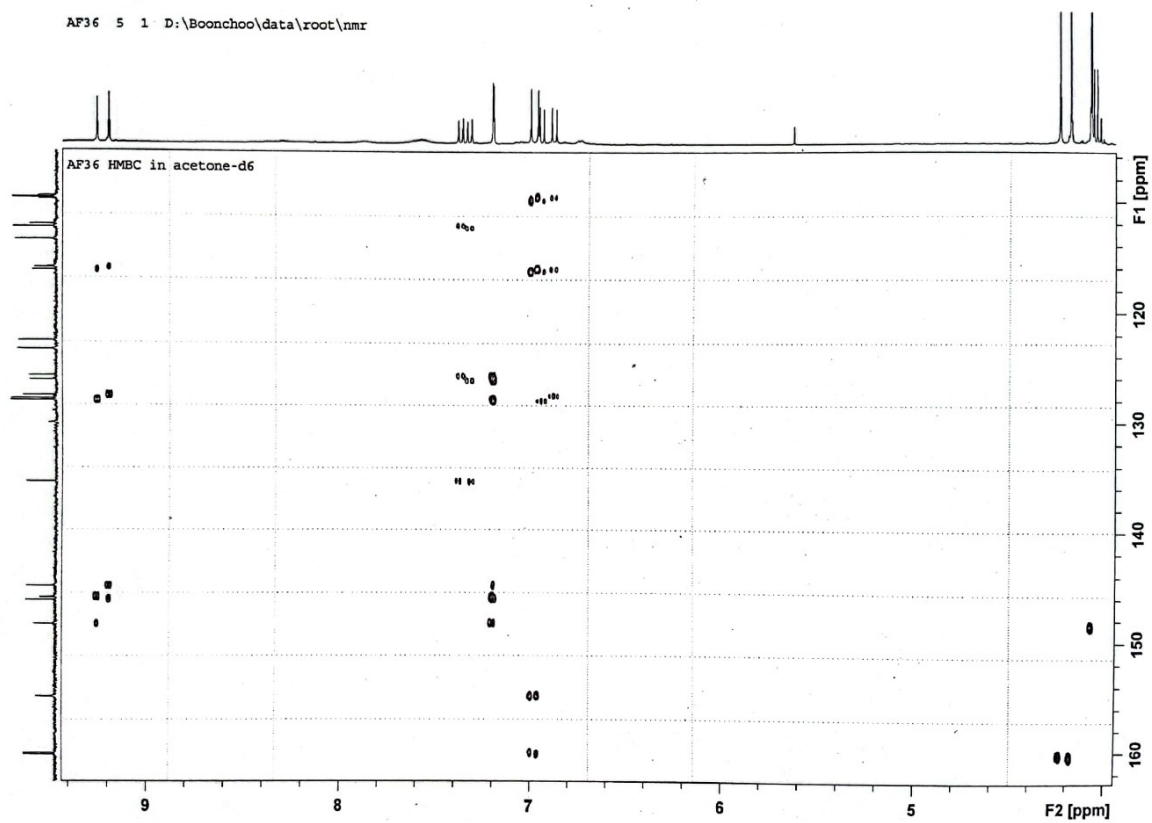

Figure S8. HMBC (1) correlation of **1** in acetone- $d_6$

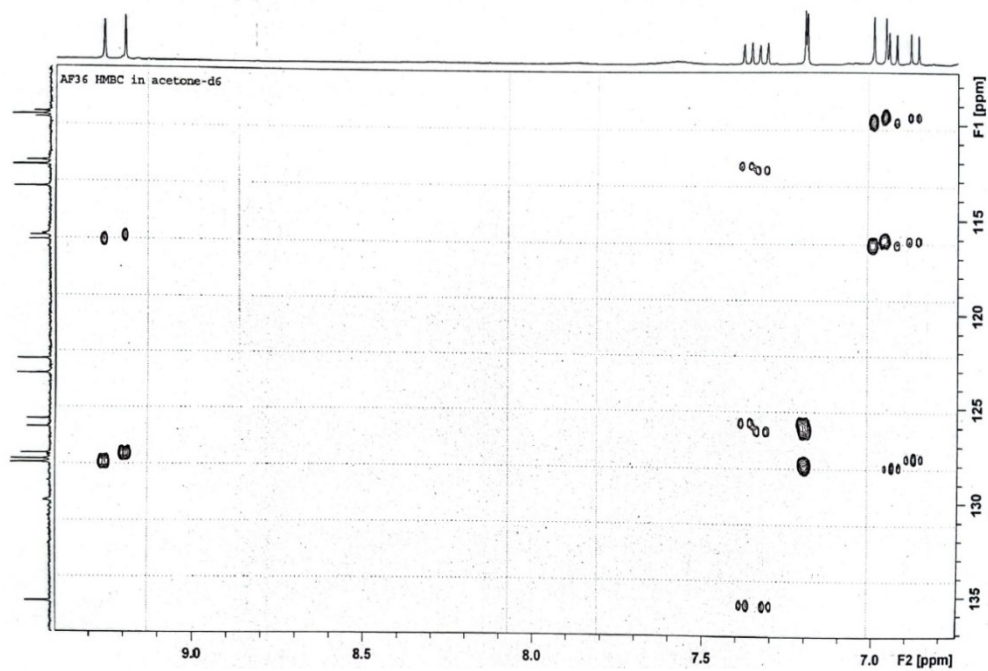

Figure S9. HMBC (2) correlation of **1** in acetone- $d_6$

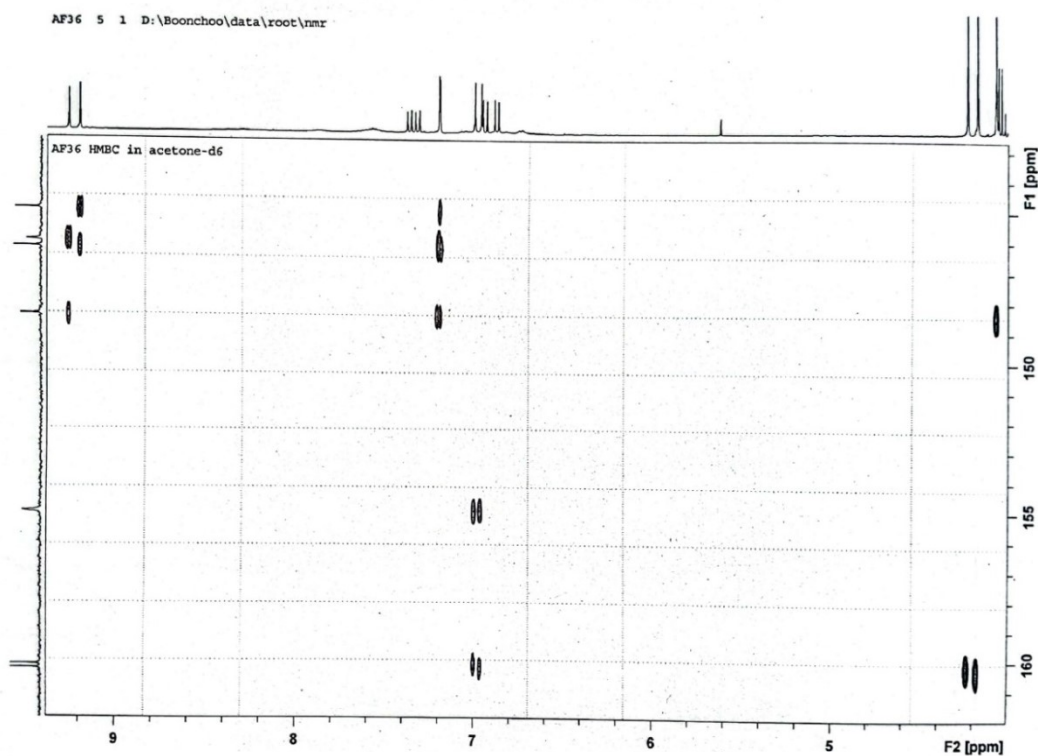

Figure S10. HMBC (3) correlation of **1** in acetone- $d_6$



AF36 5 1 D:\Boonchoo\data\root\nmr

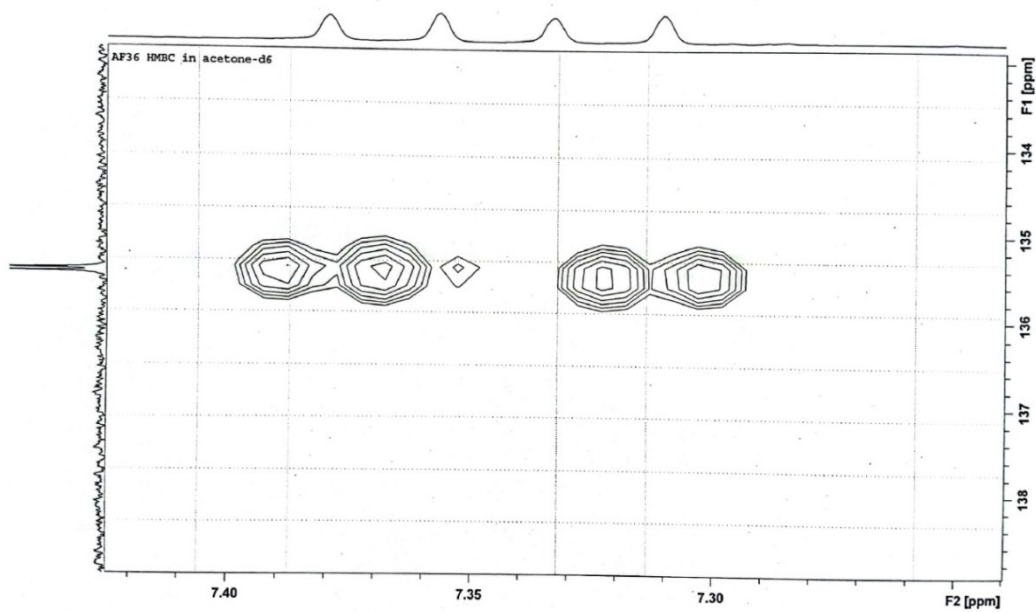

Figure S11. HMBC (4) correlation of **1** in acetone-*d*<sub>6</sub>

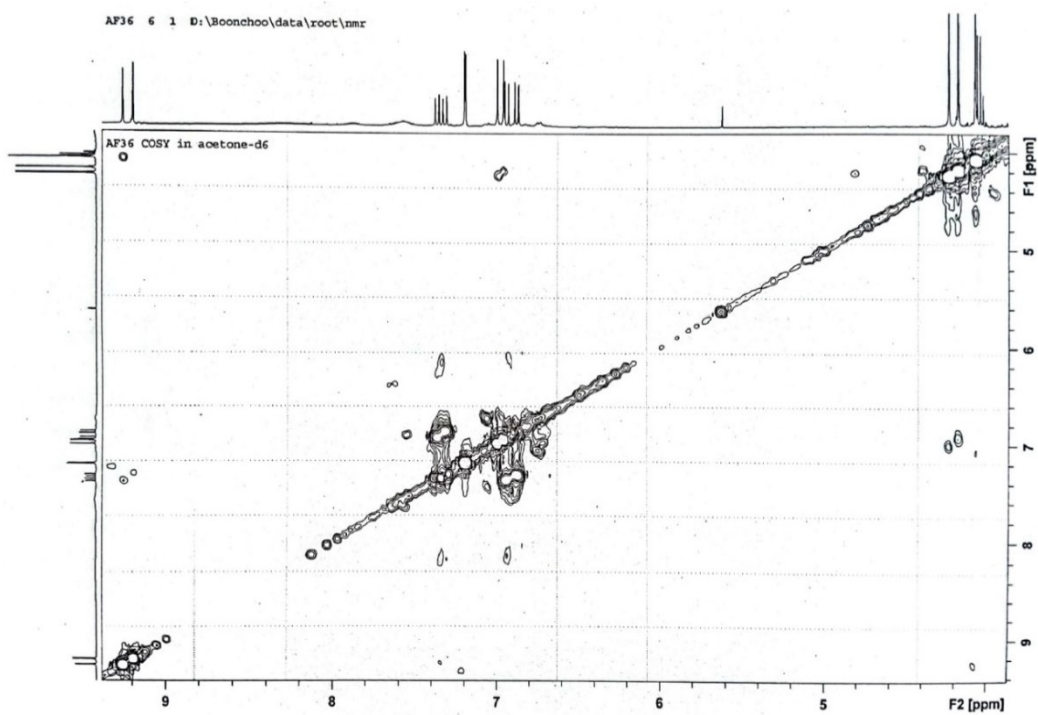

Figure S12. COSY correlation of **1** in acetone-*d*<sub>6</sub>

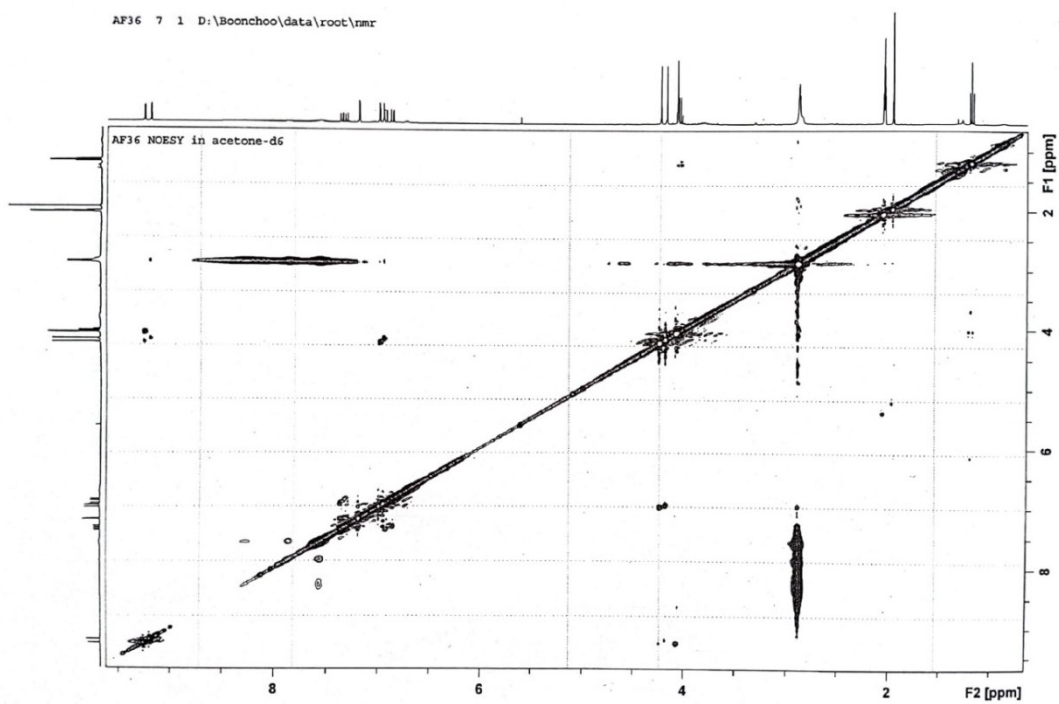

Figure S13. NOESY correlation of **1** in acetone- $d_6$

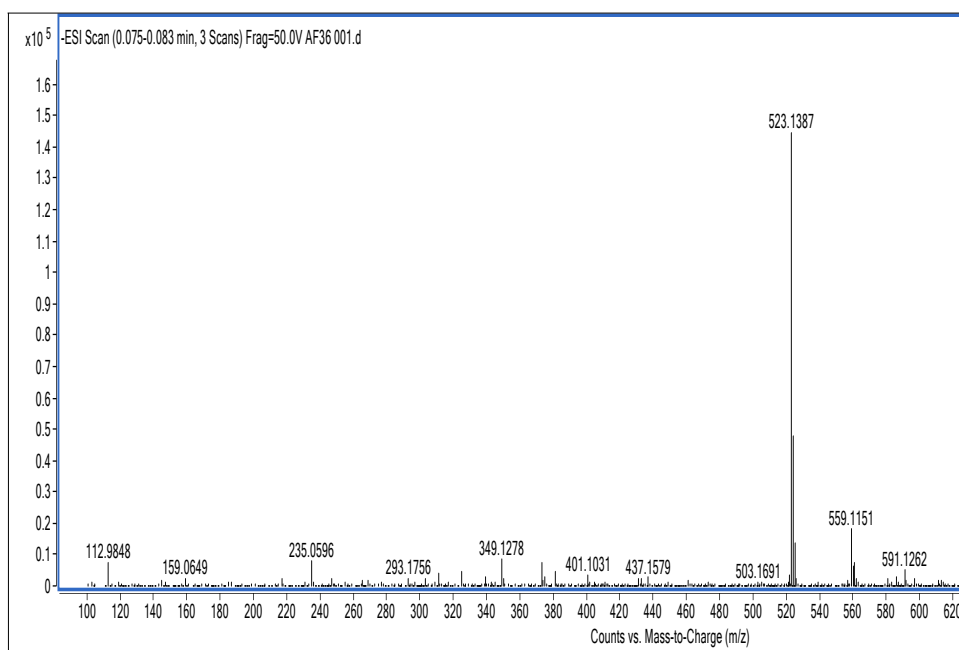

Figure S14. HRESIMS spectrum of **1**

**Table S1.** NMR spectral data of **2** and n-eicosyl-trans ferulate

| Position                            | Compound <b>2</b> (acetone- $d_6$ ) |            | n-eicosyl-trans ferulate* (CDCl <sub>3</sub> ) |            |
|-------------------------------------|-------------------------------------|------------|------------------------------------------------|------------|
|                                     | $\delta_H$ (mult., $J$ in Hz)       | $\delta_C$ | $\delta_H$ (mult., $J$ in Hz)                  | $\delta_C$ |
| 1                                   | -                                   | 127.9      | -                                              | 127.1      |
| 2                                   | 7.14 (dd, $J = 2, 8$ Hz)            | 124.0      | 7.07 (dd, $J = 2, 8$ Hz)                       | 122.9      |
| 3                                   | 6.87 (d, $J = 8.4$ Hz)              | 116.1      | 6.91 (d, $J = 8$ Hz)                           | 114.6      |
| 4                                   | -                                   | 150.3      | -                                              | 146.7      |
| 5                                   | -                                   | 149.0      | -                                              | 147.8      |
| 6                                   | 7.34 (d, $J = 2$ Hz)                | 111.3      | 7.03 (d, $J = 2$ Hz)                           | 109.3      |
| 7                                   | 7.59 (d, $J = 16$ Hz)               | 145.6      | 7.61 (d, $J = 16$ Hz)                          | 144.6      |
| 8                                   | 6.39 (d, $J = 16$ Hz)               | 116.0      | 6.29 (d, $J = 16$ Hz)                          | 115.6      |
| 9                                   | -                                   | 167.5      | -                                              | 167.3      |
| 1'                                  | 4.15 (t)                            | 64.7       | 4.18 (t)                                       | 64.6       |
| 2'                                  | 1.58 (m)                            | 29.6       | 1.64 (m)                                       | 31.8       |
| 3'                                  | 1.42 (m)                            | 26.8       | 1.64 (m)                                       | 25.9       |
| -(CH <sub>2</sub> ) <sub>14</sub> - | 1.28 (m)                            | 23.4-29.6  | 1.25 (m)                                       | 25.9-29.6  |
| n-2                                 | 1.28 (m)                            | 32.7       | 1.25 (m)                                       | 31.9       |
| n-1                                 | 1.28 (m)                            | 23.4       | 1.25 (m)                                       | 22.7       |
| Me                                  | 0.87 (t)                            | 14.4       | 0.86 (t)                                       | 14.1       |
| MeO-5                               | 3.92 (s)                            | 56.42      | 3.92 (s)                                       | 55.9       |

\*A. M. Baldé, M. Claeys, L. A. Pieters, V. Wray and A. J. Vlietinck, Ferulic acid ester from stem bark of *Pavetta owariensis*, *Phytochemistry*, 1991, **30**, 1024-1026.

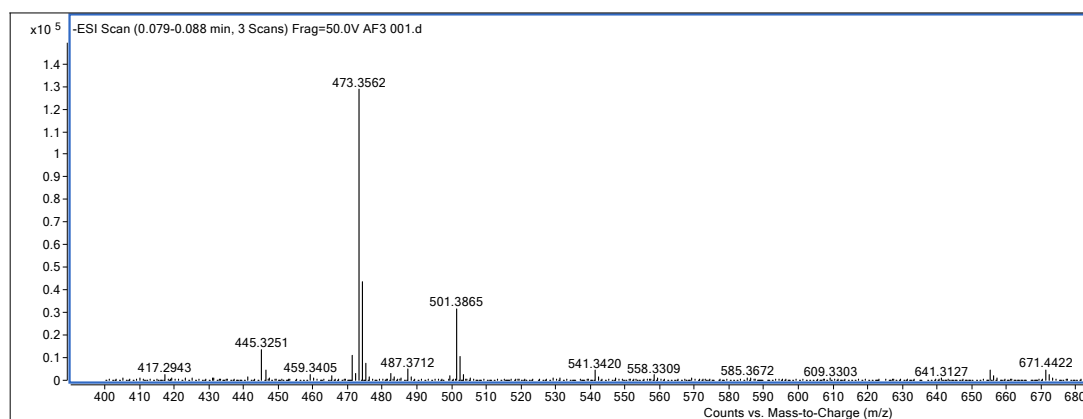**Figure S15.** HRESIMS spectrum of **2****Table S2.** NMR spectral data of **3** and denthyrsinin

| Position | Compound <b>3</b> (acetone- $d_6$ ) | Denthyrsinin* (CDCl <sub>3</sub> ) |
|----------|-------------------------------------|------------------------------------|
|----------|-------------------------------------|------------------------------------|

|       | $\delta_{\text{H}}$ (mult., $J$ in Hz) | $\delta_{\text{C}}$ | $\delta_{\text{H}}$ (mult., $J$ in Hz) | $\delta_{\text{C}}$ |
|-------|----------------------------------------|---------------------|----------------------------------------|---------------------|
| 1     | 7.25 (s)                               | 105.9               | 7.09 (s)                               | 104.9               |
| 2     | -                                      | 148.7               | -                                      | 146.8               |
| 3     | -                                      | 141.2               | -                                      | 139.4               |
| 4     | -                                      | 145.4               | -                                      | 144.0               |
| 4a    | -                                      | 120.4               | -                                      | 119.2               |
| 4b    | -                                      | 124.8               | -                                      | 124.2               |
| 5     | 9.15 (d, $J = 9.2$ Hz)                 | 124.2               | 9.16 (d, $J = 9.2$ Hz)                 | 124.0               |
| 6     | 7.24 (d, $J = 9.2$ Hz)                 | 117.9               | 7.30 (d, $J = 9.2$ Hz)                 | 116.1               |
| 7     | -                                      | 147.3               | -                                      | 145.6               |
| 8     | -                                      | 142.2               | -                                      | 140.8               |
| 8a    | -                                      | 128.5               | -                                      | 125.7               |
| 9     | 7.85 (d, $J = 9.2$ Hz)                 | 118.6               | 7.82 (d, $J = 9.2$ Hz)                 | 117.9               |
| 10    | 7.67 (d, $J = 8.8$ Hz)                 | 128.7               | 7.63 (d, $J = 9.2$ Hz)                 | 127.5               |
| 10a   | -                                      | 126.4               | -                                      | 126.6               |
| MeO-2 | 3.99                                   | 56.3                | 4.05 (s)                               | 56.1                |
| MeO-4 | 3.91                                   | 59.6                | 3.94 (s)                               | 59.8                |
| MeO-8 | 3.92                                   | 61.3                | 3.98 (s)                               | 61.9                |
| HO-3  | 7.96 (s)                               | -                   | 5.79 (s)                               | -                   |
| HO-7  | 8.31 (s)                               | -                   | 6.01 (s)                               | -                   |

\* M. Ono, Y. Ito, C. Masuoka, H. Koga and T. Nohar, Antioxidative constituents from *Dendrobii herba* (stems of *Dendrobium* spp.), *Food. Sci. Technol. Int.*, 1995, **1**, 115-120.

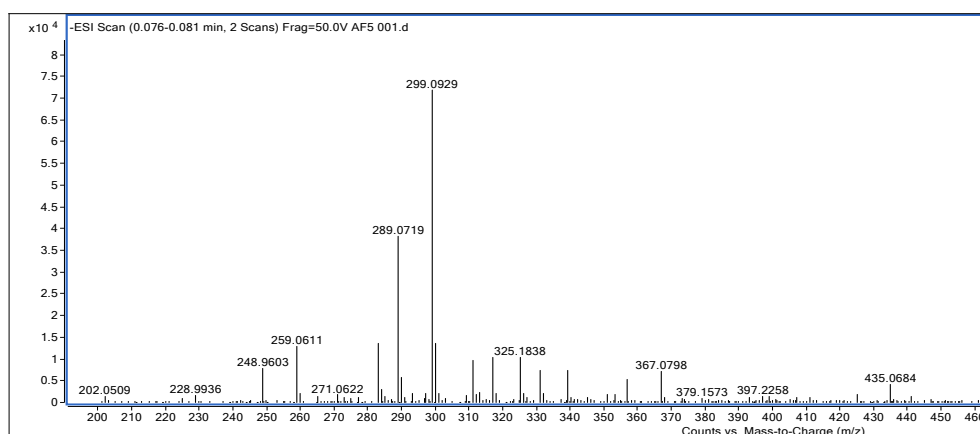

Figure S16. HRESIMS spectrum of **3**

**Table S3.** NMR spectral data of **4** and 2,4-dimethoxy-3,7-dihydroxyphenanthrene

| Position | Compound 4 (acetone- <i>d</i> <sub>6</sub> ) |                     | 2,4-dimethoxy-3,7-dihydroxyphenanthrene (CDCl <sub>3</sub> ) |                     |
|----------|----------------------------------------------|---------------------|--------------------------------------------------------------|---------------------|
|          | $\delta_{\text{H}}$ (mult., <i>J</i> in Hz)  | $\delta_{\text{C}}$ | $\delta_{\text{H}}$ (mult., <i>J</i> in Hz)                  | $\delta_{\text{C}}$ |
| 1        | 7.22 (s)                                     | 105.9               | 7.12 (s)                                                     | 105.0               |
| 2        | -                                            | 148.4               | -                                                            | 147.7               |
| 3        | -                                            | 141.1               | -                                                            | 139.9               |
| 4        | -                                            | 145.3               | -                                                            | 144.5               |
| 4a       | -                                            | 120.0               | -                                                            | 119.1               |
| 4b       | -                                            | 123.9               | -                                                            | 123.0               |
| 5        | 9.34 (d, <i>J</i> = 9.2 Hz)                  | 129.1               | 9.27 (d, <i>J</i> = 9.0 Hz)                                  | 128.0               |
| 6        | 7.18 (dd, <i>J</i> = 9.2, 2.8Hz)             | 117.4               | 7.09 (dd, <i>J</i> = 9.0, 2.5Hz)                             | 116.1               |
| 7        | -                                            | 155.9               | -                                                            | 154.8               |
| 8        | 7.24 (d, <i>J</i> = 2.8 Hz)                  | 112.2               | 7.14 (d, <i>J</i> = 2.5 Hz)                                  | 111.1               |
| 8a       | -                                            | 135.0               | -                                                            | 134.2               |
| 9        | 7.45 (d, <i>J</i> = 8.8 Hz)                  | 125.3               | 7.52 (d, <i>J</i> = 9.0 Hz)                                  | 124.3               |
| 10       | 7.59 (d, <i>J</i> = 8.8 Hz)                  | 128.1               | 7.39 (d, <i>J</i> = 9.0 Hz)                                  | 127.0               |
| 10a      | -                                            | 126.4               | -                                                            | 125.8               |
| MeO-2    | 3.98 (s)                                     | 56.3                | 3.87 (s)                                                     | 55.2                |
| MeO-4    | 3.92 (s)                                     | 59.6                | 3.97 (s)                                                     | 58.6                |

\*K. W. Woo, J. E. Park, S. U. Choi, K. H. Kim and K. L. Lee, Phytochemical constituents of *Bletilla striata* and their cytotoxic activity, *Nat. Prod. Sci.*, 2014, **20**, 91-94.

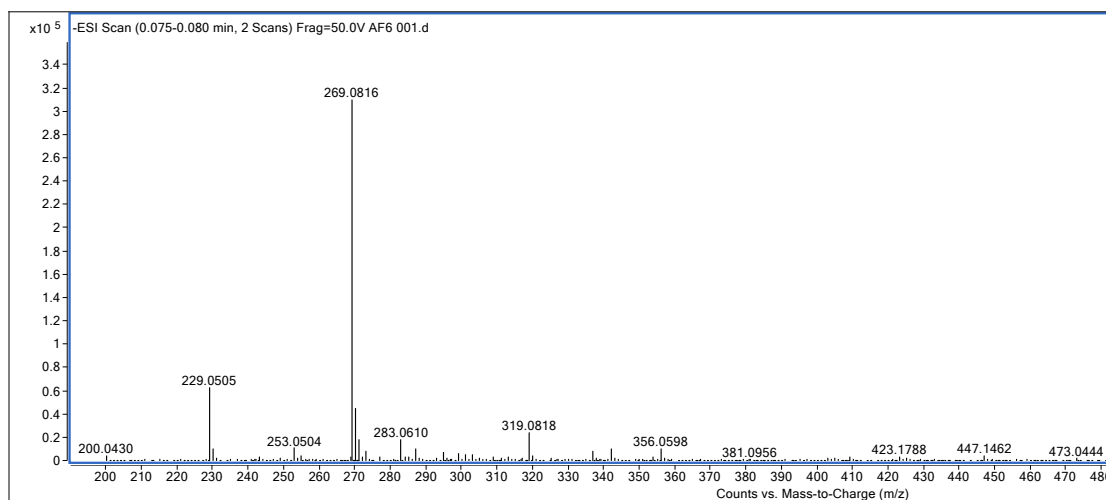

Figure S17. HRESIMS spectrum of 4

Table S4. NMR spectral data of 5 and 2,7-dihydroxy-3,4,6-trimethoxyphenanthrene

| Position | Compound 5 (acetone- <i>d</i> <sub>6</sub> ) |                     | 2,7-dihydroxy-3,4,6-trimethoxyphenanthrene* |
|----------|----------------------------------------------|---------------------|---------------------------------------------|
|          | $\delta_{\text{H}}$ (mult., <i>J</i> in Hz)  | $\delta_{\text{C}}$ | $\delta_{\text{H}}$ (mult., <i>J</i> in Hz) |
| 1        | 7.14 (s)                                     | 109.7               | 2.78 (s)                                    |
| 2        | -                                            | 150.0               | -                                           |
| 3        | -                                            | 142.6               | -                                           |
| 4        | -                                            | 152.1               | -                                           |
| 4a       | -                                            | 118.8               | -                                           |
| 4b       | -                                            | 124.7               | -                                           |
| 5        | 9.04 (s)                                     | 108.2               | 1.09 (s)                                    |
| 6        | -                                            | 148.7               | -                                           |
| 7        | -                                            | 146.5               | -                                           |
| 8        | 7.25 (s)                                     | 112.7               | 2.91 (s)                                    |
| 8a       | -                                            | 128.4               | -                                           |
| 9        | 7.48 (d, <i>J</i> = 8.8 Hz)                  | 126.7               | 2.63 (2H)                                   |
| 10       | 7.43 (d, <i>J</i> = 8.8 Hz)                  | 125.4               | 2.63 (2H)                                   |
| 10a      | -                                            | 130.7               | -                                           |
| MeO-3    | 4.01 (s)                                     | 61.3                | 5.96 (s)                                    |
| MeO-4    | 4.02 (s)                                     | 60.4                | 6.00 (s)                                    |
| MeO-6    | 4.04 (s)                                     | 56.1                | 6.07 (s)                                    |
| HO-2     | 7.29 (s)                                     | -                   | 4.10 (s)                                    |
| HO-7     | 8.28 (s)                                     | -                   | 4.10 (s)                                    |

\*R. M. Letcher and L. R. M. Nhamo, Chemical constituents of the *Combretaceae*. part III. substituted phenanthrenes, 9,10-dihydrophenanthrenes, and bibenzyls from the heartwood of *Combretum psidioides*, *J. Chem. Soc., Perkin. Trans. 1.*, 1972, 2941-2946.

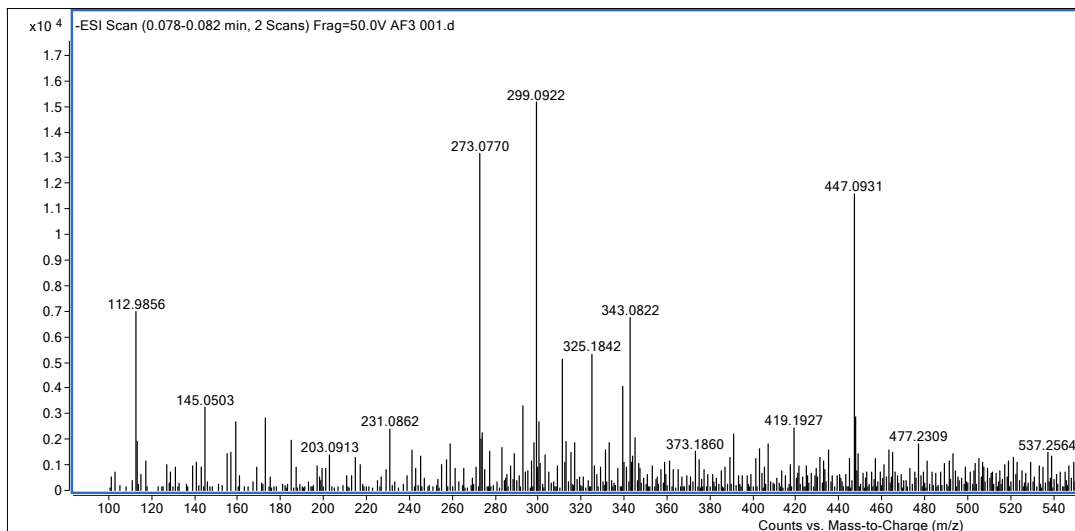

Figure S18. HRESIMS spectrum of **5**

Table S5. NMR spectral data of **6** and 3,7-dihydroxy-2,4,6-trimethoxyphenanthrene

| Position | Compound <b>6</b> (acetone- <i>d</i> <sub>6</sub> ) |                     | 3,7-dihydroxy-2,4,6-trimethoxyphenanthrene* (CDCl <sub>3</sub> ) |                     |
|----------|-----------------------------------------------------|---------------------|------------------------------------------------------------------|---------------------|
|          | $\delta_{\text{H}}$ (mult., <i>J</i> in Hz)         | $\delta_{\text{C}}$ | $\delta_{\text{H}}$ (mult., <i>J</i> in Hz)                      | $\delta_{\text{C}}$ |
| 1        | 7.22 (s)                                            | 105.6               | 6.97 (s)                                                         | 103.6               |
| 2        | -                                                   | 144.9               | -                                                                | 146.5               |
| 3        | -                                                   | 140.6               | -                                                                | 138.3               |
| 4        | -                                                   | 148.3               | -                                                                | 143.0               |
| 4a       | -                                                   | 126.7               | -                                                                | 117.4               |
| 4b       | -                                                   | 124.2               | -                                                                | 122.2               |
| 5        | 9.06 (s)                                            | 108.1               | 8.95 (s)                                                         | 106.1               |
| 6        | -                                                   | 148.4               | -                                                                | 146.6               |
| 7        | -                                                   | 146.5               | -                                                                | 144.3               |
| 8        | 7.25 (s)                                            | 105.9               | 7.19 (s)                                                         | 110.4               |
| 8a       | -                                                   | 128.8               | -                                                                | 126.9               |
| 9        | 7.45 (d, <i>J</i> = 8.8 Hz)                         | 124.9               | 7.31(s)                                                          | 122.8               |
| 10       | 7.51 (d, <i>J</i> = 8.8 Hz)                         | 125.7               | 7.31(s)                                                          | 123.7               |
| 10a      | -                                                   | 119.5               | -                                                                | 124.9               |
| MeO-2    | 4.04 (s)                                            | 59.8                | 3.88 (s)                                                         | 54.0                |
| MeO-4    | 3.99 (s)                                            | 56.2                | 3.85 (s)                                                         | 57.8                |
| MeO-6    | 3.98 (s)                                            | 56.0                | 3.97 (s)                                                         | 53.8                |

\*Y. Chen, J. Xu, H. Yu, C. Qing, Y. Zhang, Y. Liu and J. Wang. 3,7-Dihydroxy-2,4<sup>6</sup>-trimethoxyphenanthrene, A New Phenanthrene from *Bulbophyllum odoratissimum*, *J. Korean Chem. Soc.*, 2007, **51**, 352-355.

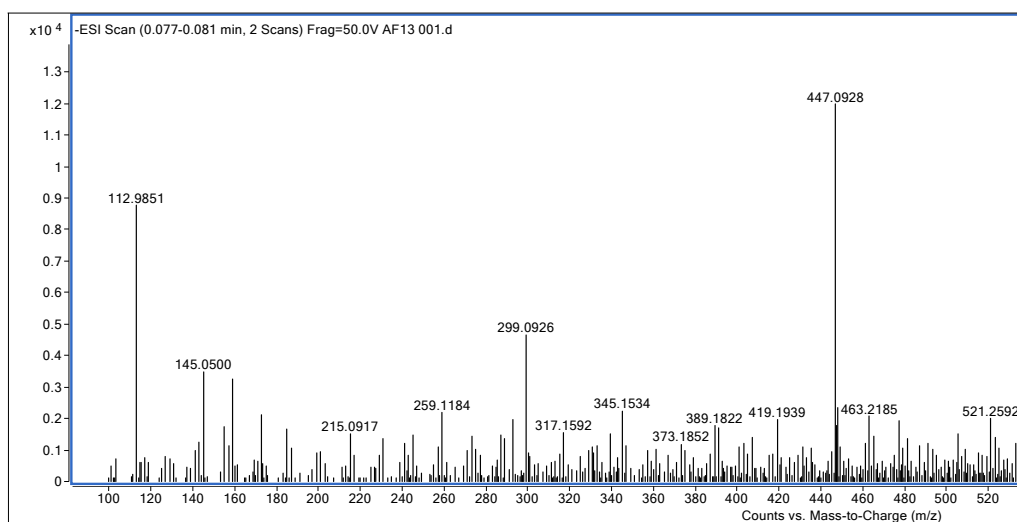

Figure S19. HRESIMS spectrum of **6**

Table S6. NMR spectral data of **7** and agrostinin

| Position | Compound <b>7</b> (acetone- <i>d</i> <sub>6</sub> ) |                     | Agrostinin* (acetone- <i>d</i> <sub>6</sub> ) |                     |
|----------|-----------------------------------------------------|---------------------|-----------------------------------------------|---------------------|
|          | $\delta_{\text{H}}$ (mult., <i>J</i> in Hz)         | $\delta_{\text{C}}$ | $\delta_{\text{H}}$ (mult., <i>J</i> in Hz)   | $\delta_{\text{C}}$ |
| 1        | -                                                   | 109.1               | -                                             | 109.8               |
| 2        | -                                                   | 154.1               | -                                             | 155.1               |
| 3        | 7.02 (s)                                            | 99.1                | 7.00 (s)                                      | 100.0               |
| 4        | -                                                   | 159.3               | -                                             | 160.2               |
| 4a       | -                                                   | 115.4               | -                                             | 116.3               |
| 4b       | -                                                   | 125.0               | -                                             | 125.8               |
| 5        | 9.27 (s)                                            | 159.0               | 9.25 (s)                                      | 109.7               |
| 6        | -                                                   | 147.7               | -                                             | 148.5               |
| 7        | -                                                   | 145.2               | -                                             | 146.0               |
| 8        | 7.21 (s)                                            | 111.3               | 7.19 (s)                                      | 112.2               |
| 8a       | -                                                   | 127.1               | -                                             | 128.1               |
| 9        | 7.37 (d, <i>J</i> = 8.8 Hz)                         | 127.0               | 7.36 (d, <i>J</i> = 9.2 Hz)                   | 127.9               |
| 10       | 6.92 (d, <i>J</i> = 9.2 Hz)                         | 122.5               | 6.93 (d, <i>J</i> = 9.2 Hz)                   | 123.3               |
| 10a      | -                                                   | 134.6               | -                                             | 135.4               |
| 1'       | -                                                   | 109.1               | -                                             | 109.8               |
| 2'       | -                                                   | 154.1               | -                                             | 155.1               |
| 3'       | 7.02 (s)                                            | 99.1                | 7.00 (s)                                      | 100.0               |
| 4'       | -                                                   | 159.3               | -                                             | 160.2               |
| 4a'      | -                                                   | 115.4               | -                                             | 116.3               |
| 4b'      | -                                                   | 125.0               | -                                             | 125.8               |
| 5'       | 9.27 (s)                                            | 159.0               | 9.25 (s)                                      | 109.7               |
| 6'       | -                                                   | 147.7               | -                                             | 148.5               |
| 7'       | -                                                   | 145.2               | -                                             | 146.0               |



|        |                        |       |                        |       |
|--------|------------------------|-------|------------------------|-------|
| 8'     | 7.21 (s)               | 111.3 | 7.19 (s)               | 112.2 |
| 8a'    | -                      | 127.1 | -                      | 128.1 |
| 9'     | 7.37 (d, $J = 8.8$ Hz) | 127.0 | 7.36 (d, $J = 9.2$ Hz) | 127.9 |
| 10'    | 6.92 (d, $J = 9.2$ Hz) | 122.5 | 6.93 (d, $J = 9.2$ Hz) | 123.3 |
| 10a'   | -                      | 134.6 | -                      | 135.4 |
| MeO-4  | 4.25 (s)               | 55.3  | 4.23 (s)               | 55.6  |
| MeO-6  | 4.09 (s)               | 55.2  | 4.07 (s)               | 56.0  |
| MeO-4' | 4.25 (s)               | 55.3  | 4.23 (s)               | 56.1  |
| MeO-6' | 4.09 (s)               | 55.2  | 4.07 (s)               | 56.0  |

\*C. Lin, T. Hwang, F. Chen, C. Huang, H. Hung and T. Wu, Chemical constituents of the rhizomes of *Bletilla formosana* and their potential anti-inflammatory activity, *J. Nat. Prod.*, 2016, **79**, 1911-1921.

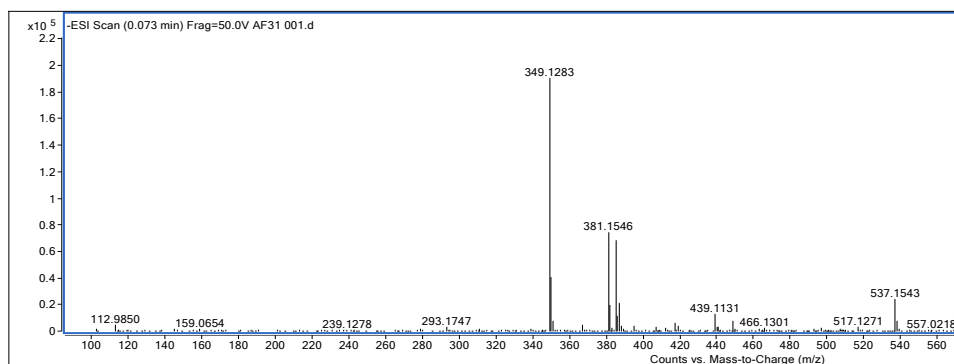

Figure S20. HRESIMS spectrum of **7**

**Table S7.** NMR spectral data of **8** and trans-n-coumaroyltyramine

| Position | Compound <b>8</b> (acetone- $d_6$ ) |            | Trans-N-coumaroyltyramine*( $CD_3OD$ ) |            |
|----------|-------------------------------------|------------|----------------------------------------|------------|
|          | $\delta_H$ (mult., $J$ in Hz)       | $\delta_C$ | $\delta_H$ (mult., $J$ in Hz)          | $\delta_C$ |
| 1        | -                                   | 127.8      | -                                      | 127.7      |
| 2        | 7.41 (d, $J = 6.8$ Hz)              | 130.1      | 7.41 (d, $J = 8.4$ Hz)                 | 130.5      |
| 3        | 6.85 (d, $J = 6.8$ Hz)              | 116.5      | 6.80 (d, $J = 8.4$ Hz)                 | 116.2      |
| 4        | -                                   | 160.0      | -                                      | 160.5      |
| 5        | 6.85 (d, $J = 6.8$ Hz)              | 116.5      | 6.80 (d, $J = 8.4$ Hz)                 | 116.2      |
| 6        | 7.41 (d, $J = 6.8$ Hz)              | 130.1      | 7.41 (d, $J = 8.4$ Hz)                 | 130.5      |
| 7        | 7.45 (d, $J = 15.6$ Hz)             | 140.0      | 6.38 (d, $J = 15.5$ Hz)                | 141.8      |
| 8        | 6.47 (d, $J = 15.6$ Hz)             | 119.7      | 7.44 (d, $J = 15.5$ Hz)                | 118.4      |
| 9        | -                                   | 166.4      | -                                      | 169.2      |
| 1'       | -                                   | 131.1      | -                                      | 131.3      |
| 2'       | 7.06 (d, $J = 7.2$ Hz)              | 130.5      | 7.06 (d, $J = 8.6$ Hz)                 | 130.7      |
| 3'       | 6.76 (d, $J = 6.4$ Hz)              | 116.0      | 6.73 (d, $J = 8.6$ Hz)                 | 116.7      |
| 4'       | -                                   | 156.7      | -                                      | 156.9      |
| 5'       | 6.76 (d, $J = 6.4$ Hz)              | 116.0      | 6.73 (d, $J = 8.6$ Hz)                 | 116.7      |
| 6'       | 7.06 (d, $J = 7.2$ Hz)              | 130.5      | 7.06 (d, $J = 8.6$ Hz)                 | 130.7      |

|    |                      |      |                      |      |
|----|----------------------|------|----------------------|------|
| 7' | 2.74 (t, $J=7.2$ Hz) | 35.7 | 2.75 (t, $J=7.5$ Hz) | 35.8 |
| 8' | 3.45 (t, $J=7.2$ Hz) | 41.9 | 3.46 (t, $J=7.5$ Hz) | 42.5 |

\*A. M. Al-Taweel, S. Perveen, A. M. El-Shafae, G. A. Fawzy, A. Malik, N. Afza, L. Iqbal and M. Latif, Bioactive phenolic amides from *Celtis africana*, *Molecules*, 2012, **17**, 2675-2682.

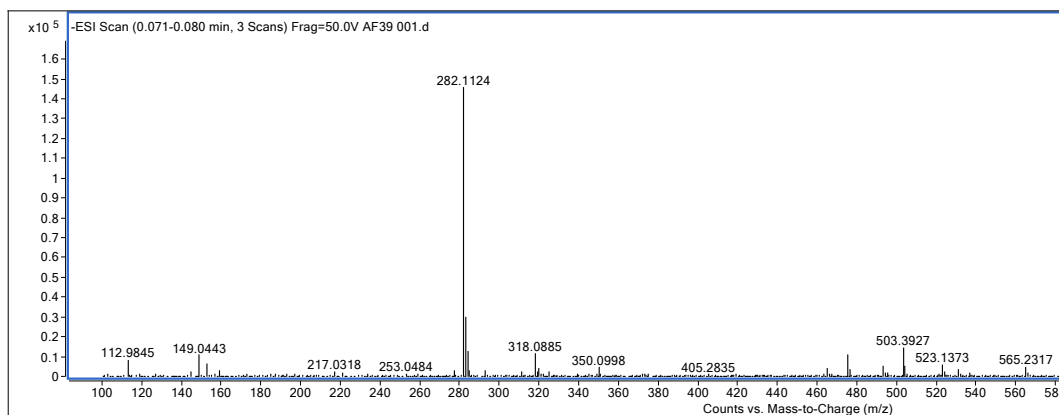

Figure S21. HRESIMS spectrum of **8**

**Table S8.** NMR spectral data of **9** and syringaresinol

| Position | Compound <b>9</b> (acetone- $d_6$ )    |                     | Syringaresinol* (CDCl $_3$ )           |                     |
|----------|----------------------------------------|---------------------|----------------------------------------|---------------------|
|          | $\delta_{\text{H}}$ (mult., $J$ in Hz) | $\delta_{\text{C}}$ | $\delta_{\text{H}}$ (mult., $J$ in Hz) | $\delta_{\text{C}}$ |
| 1        | -                                      | 113.2               | -                                      | 132.1               |
| 2        | 6.68 (s)                               | 104.4               | 6.59 (s)                               | 102.8               |
| 3        | -                                      | 148.6               | -                                      | 147.2               |
| 4        | -                                      | 136.2               | -                                      | 134.4               |
| 5        | -                                      | 148.6               | -                                      | 147.2               |
| 6        | 6.68 (s)                               | 104.4               | 6.59 (s)                               | 102.8               |
| 7        | 4.67 (d, $J=4$ Hz)                     | 86.8                | 4.73 (d, $J=4.3$ Hz)                   | 86.0                |
| 8        | 3.09 (m)                               | 55.3                | 3.10 (m)                               | 54.3                |
| 9a       | 4.22 (dd)                              | 72.3                | 4.28 (dd, $J=8.8, 6.4$ Hz)             | 71.8                |
| 9b       | 3.84                                   | 72.3                | 3.92                                   | 71.8                |
| 1'       | -                                      | 113.2               | -                                      | 132.1               |
| 2'       | 6.68 (s)                               | 104.4               | 6.59 (s)                               | 102.8               |
| 3'       | -                                      | 148.6               | -                                      | 147.2               |
| 4'       | -                                      | 136.2               | -                                      | 134.4               |
| 5'       | -                                      | 148.6               | -                                      | 147.2               |
| 6'       | 6.68 (s)                               | 104.4               | 6.59 (s)                               | 102.8               |
| 7'       | 4.67 (d, $J=4$ Hz)                     | 86.8                | 4.73 (d, $J=4.3$ Hz)                   | 86.0                |

|        |           |      |                              |      |
|--------|-----------|------|------------------------------|------|
| 8'     | 3.09 (m)  | 55.3 | 3.10 (m)                     | 54.3 |
| 9'a    | 4.22 (dd) | 72.3 | 4.28 (dd, $J = 8.8, 6.4$ Hz) | 71.8 |
| 9'b    | 3.84      | 72.3 | 3.92                         | 71.8 |
| MeO-3  | 3.83 (s)  | 56.6 | 3.89 (s)                     | 56.4 |
| MeO-5  | 3.82 (s)  | 56.6 | 3.89 (s)                     | 56.4 |
| MeO-3' | 3.83 (s)  | 56.6 | 3.89 (s)                     | 56.4 |
| MeO-5' | 3.82 (s)  | 56.6 | 3.89 (s)                     | 56.4 |

\*M. Ono, Y. Ito, C. Masuoka, H. Koga and T. Nohar, Antioxidative constituents from *Dendrobii herba* (stems of *Dendrobium* spp.), *Food. Sci. Technol. Int.*, 1995, **1**, 115-120.

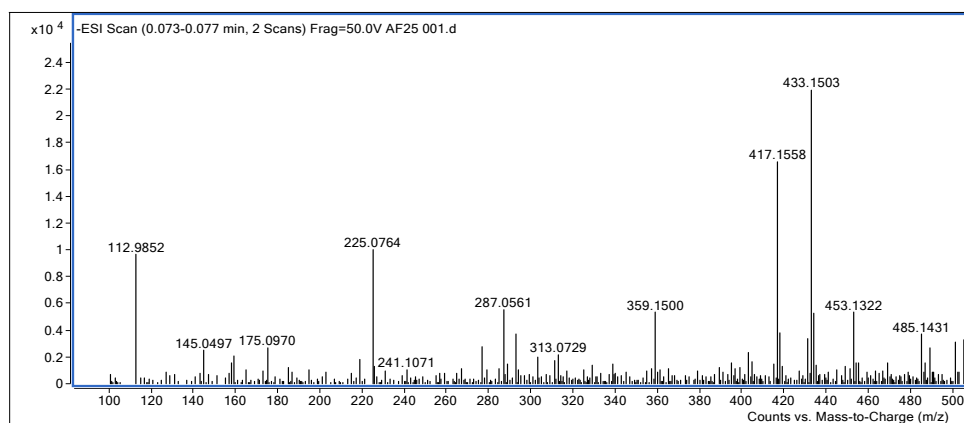

Figure S22. HRESIMS spectrum of **9**

**Table S9.** NMR spectral data of **10** and trans-n-feruloytyramine

| Position | Compound 10 (acetone-d <sub>6</sub> )  |                     | Trans-N-Feruloytyramine* (CD <sub>3</sub> OD) |                     |
|----------|----------------------------------------|---------------------|-----------------------------------------------|---------------------|
|          | $\delta_{\text{H}}$ (mult., $J$ in Hz) | $\delta_{\text{C}}$ | $\delta_{\text{H}}$ (mult., $J$ in Hz)        | $\delta_{\text{C}}$ |
| 1        | -                                      | 128.3               | -                                             | 128.2               |
| 2        | 7.15 (d, $J = 2.0$ Hz)                 | 111.2               | 7.13 (d, $J = 1.2$ Hz)                        | 111.5               |
| 3        | -                                      | 149.0               | -                                             | 149.3               |
| 4        | -                                      | 148.6               | -                                             | 149.8               |
| 5        | 6.83 (d, $J = 8.0$ Hz)                 | 116.0               | 6.81 (d, $J = 8.5$ Hz)                        | 116.4               |
| 6        | 7.03 (dd, $J = 8.0$ Hz, 2.0 Hz)        | 122.5               | 7.04 (dd, $J = 8.5, 1.2$ Hz)                  | 123.2               |
| 7        | 7.44 (d, $J = 15.6$ Hz)                | 140.2               | 7.44 (d, $J = 15.6$ Hz)                       | 142.0               |
| 8        | 6.50 (d, $J = 15.6$ Hz)                | 120.0               | 6.41 (d, $J = 15.5$ Hz)                       | 118.7               |
| 9        | -                                      | 166.3               | -                                             | 169.2               |
| 1'       | -                                      | 131.2               | -                                             | 131.3               |
| 2'       | 7.06 (d, $J = 8.4$ Hz)                 | 130.5               | 7.07 (d, $J = 8.4$ Hz)                        | 130.7               |
| 3'       | 6.75 (d, $J = 8.4$ Hz)                 | 116.0               | 6.73 (d, $J = 8.4$ Hz)                        | 116.2               |
| 4'       | -                                      | 156.7               | -                                             | 156.9               |
| 5'       | 6.75 (d, $J = 8.4$ Hz)                 | 116.0               | 6.73 (d, $J = 8.4$ Hz)                        | 116.2               |
| 6'       | 7.06 (d, $J = 8.4$ Hz)                 | 130.5               | 7.07 (d, $J = 8.4$ Hz)                        | 130.7               |

|       |                        |      |                        |      |
|-------|------------------------|------|------------------------|------|
| 7'    | 2.74 (t, $J = 7.6$ Hz) | 35.0 | 2.76 (t, $J = 7.5$ Hz) | 35.8 |
| 8'    | 3.48 (t, $J = 7.6$ Hz) | 41.9 | 3.47 (t, $J = 7.5$ Hz) | 42.5 |
| MeO-3 | 3.88 (s)               | 56.2 | 3.85 (s)               | 56.4 |

\*A. M. Al-Taweel, S. Perveen, A. M. El-Shafae, G. A. Fawzy, A. Malik, N. Afza, L. Iqbal and M. Latif, Bioactive phenolic amides from *Celtis africana*, *Molecules*, 2012, **17**, 2675-2682.

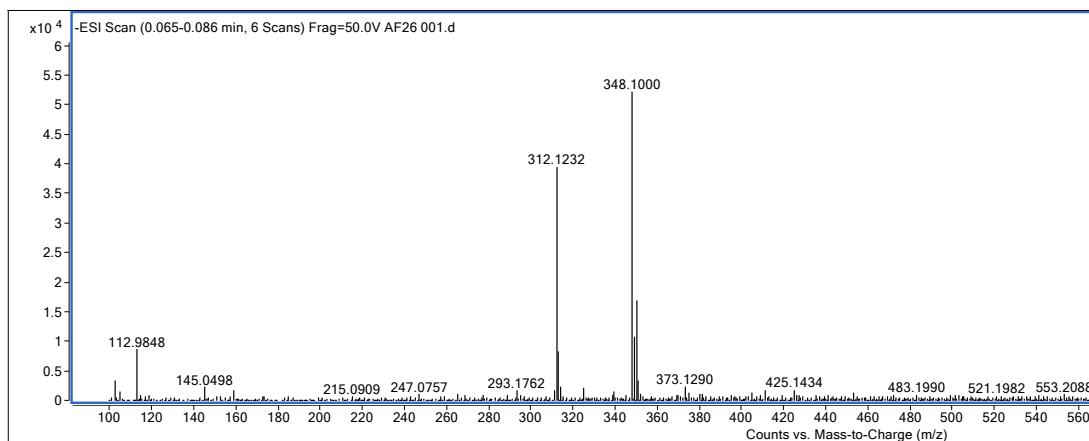

Figure S23. HRESIMS spectrum of **10**

**Table S10.** Effects of constituents of *Aerides falcata* on the viability of BV-2 microglial cells

| Comp.     | Percentage cell viability (mean $\pm$ SD) (%) |                 |                       |                      |                      |                   |
|-----------|-----------------------------------------------|-----------------|-----------------------|----------------------|----------------------|-------------------|
|           | Vehicle                                       | 5 $\mu$ M       | 10 $\mu$ M            | 20 $\mu$ M           | 40 $\mu$ M           | 80 $\mu$ M        |
| <b>1</b>  | 100.0 $\pm$ 0.0                               | 102.2 $\pm$ 4.1 | 44.1 $\pm$<br>11.7*** | 19.9 $\pm$<br>2.7*** | 15.3 $\pm$<br>1.0*** | 13.4 $\pm$ 0.6*** |
| <b>2</b>  | 100.0 $\pm$ 0.0                               | 100.7 $\pm$ 1.9 | 97.3 $\pm$ 5.5        | 99.5 $\pm$ 3.9       | 101.3 $\pm$ 2.6      | 103.1 $\pm$ 0.6   |
| <b>3</b>  | 100.0 $\pm$ 0.0                               | 97.9 $\pm$ 3.1  | 101.9 $\pm$ 5.0       | 109.2 $\pm$ 3.5      | 122.7 $\pm$ 4.7      | 77.6 $\pm$ 7.2*** |
| <b>4</b>  | 100.0 $\pm$ 0.0                               | 102.3 $\pm$ 7.  | 104.9 $\pm$ 2.8       | 98.4 $\pm$ 6.4       | 96.1 $\pm$ 6.9       | 70.0 $\pm$ 1.8*** |
| <b>5</b>  | 100.0 $\pm$ 0.0                               | 102.2 $\pm$ 3.0 | 100.2 $\pm$ 5.5       | 102.3 $\pm$ 4.1      | 85.4 $\pm$<br>1.4*** | 83.8 $\pm$ 0.2*** |
| <b>6</b>  | 100.0 $\pm$ 0.0                               | 100.7 $\pm$ 3.6 | 103.0 $\pm$ 3.6       | 99.2 $\pm$ 3.1       | 98.6 $\pm$ 5.7       | 84.9 $\pm$ 2.7*** |
| <b>7</b>  | 100.0 $\pm$ 0.0                               | 100.7 $\pm$ 4.6 | 94.5 $\pm$ 2.3        | 72.8 $\pm$<br>9.1*** | 36.9 $\pm$<br>7.3*** | 32.9 $\pm$ 8.6*** |
| <b>9</b>  | 100.0 $\pm$ 0.0                               | 98.1 $\pm$ 0.5  | 86.1 $\pm$ 4.4**      | 79.7 $\pm$<br>4.3*** | 73.7 $\pm$<br>2.8*** | 58.1 $\pm$ 8.3*** |
| <b>10</b> | 100.0 $\pm$ 0.0                               | 99.0 $\pm$ 2.7  | 100.4 $\pm$ 6.6       | 98.5 $\pm$ 7.3       | 100.0 $\pm$ 2.1      | 82.3 $\pm$ 5.6**  |

The statistical differences were analyzed using one-way ANOVA followed by Dunnett's post-hoc test. \*\* $p < 0.01$ , \*\*\* $p < 0.001$  denote significantly reduced cell viability; vehicle (0.5% DMSO) vs. other groups of treatments.

**Table S11.** Effects of compounds **1**, **7**, and **9** on the viability of C6 glioblastoma cells

| Comp.    | Percentage cell viability (mean ± SD) (%) |            |               |               |               |               |               |               |
|----------|-------------------------------------------|------------|---------------|---------------|---------------|---------------|---------------|---------------|
|          | Vehicle                                   | 2.5 μM     | 5 μM          | 10 μM         | 20 μM         | 40 μM         | 80 μM         | 160 μM        |
| <b>1</b> | 100.0 ± 0.0                               | 96.4 ± 3.5 | 84.6 ± 2.2*** | 85.0 ± 3.2*** | 62.1 ± 6.3*** | 39.7 ± 6.8*** | 9.6 ± 0.5***  | 7.9 ± 1.0***  |
| <b>7</b> | 100.0 ± 0.0                               | 96.4 ± 0.9 | 79.6 ± 8.3**  | 63.0 ± 8.4*** | 58.7 ± 8.4*** | 42.0 ± 0.2*** | 36.3 ± 3.4*** | 29.9 ± 1.7*** |
| <b>9</b> | 100.0 ± 0.0                               | 98.2 ± 6.5 | 82.5 ± 3.8**  | 74.5 ± 9.2*** | 71.7 ± 3.7*** | 61.8 ± 3.6*** | 55.5 ± 5.7*** | 45.1 ± 3.0*** |

The statistical differences were analyzed using one-way ANOVA followed by Dunnett's post-hoc test. \*\*p < 0.001, \*\*\*p < 0.001 denote significantly reduced cell viability; vehicle (0.5% DMSO) vs. other groups of treatments.
